# Supplementary material
Source: ML conference proceedings conference paper supplement (https://openreview.net/forum?id=Vduqw4iOE9)
Supplement: supplementary_material [file attachment]

**Library Collection Assessment:**

How would you describe the current availability of public domain and openly licensed works in your library?

- Abundant
- Moderate
- Limited
- Very limited

Approximately, what percentage of your library's collection consists of public domain or openly licensed works?

- Less than 25%
- 25-50%
- 51-75%
- More than 75%

**Digitalization Interest:**

Is your library interested in digitizing its collection for potential upload to Wikimedia projects?

- Yes
- No
- Unsure

If yes, what types of works do you believe would be most suitable for digitization and upload?

**Existing Digitization Efforts:**

Has your library undertaken any digitization projects in the past?

- Yes
- No

If yes, what was the outcome of these projects, and were any works uploaded to Wikimedia projects?

**Potential Contributions:**

Would your library be willing to contribute works to Wikimedia projects if provided with the necessary support and resources?

- Yes

- No
- Maybe

### **Work Prioritization:**

How does your library currently prioritize works for digitization?

- Based on demand from patrons
- Based on the historical significance
- Based on relevance to the local community
- Other (please specify)

Would your library be interested in adopting a prioritization framework specifically tailored for contribution to Wikimedia projects?

- Yes
- No
- Unsure

### **Impact Assessment:**

How do you assess the potential impact of digitized works on Wikimedia projects?

- Increased visibility of library collections
- Preservation of cultural heritage
- Contribution to global knowledge
- Other (please specify)

Would your library be interested in participating in impact assessment studies to measure the effectiveness of digitization efforts for Wikimedia projects?

- Yes
- No
- Maybe

### **Collaborative Selection:**

Would your library be open to collaborating with Wikimedia affiliates or volunteers in the selection of works for digitization?

- Yes
- No
- Maybe

What criteria do you think should be considered when selecting works for digitization and upload to Wikimedia projects?

**Technological Readiness:**

Does your library have the necessary technological infrastructure for digitization (e.g., scanners, digitization software)?

- Yes
- No
- Partially

If no or partially, what specific technological resources would your library require to facilitate digitization efforts?

**Infrastructure Optimization:**

What challenges does your library face in terms of infrastructure for uploading digitized works to Wikimedia Commons?

How do you believe these challenges can be addressed or mitigated to improve efficiency?

**Training Needs:**

Would your library staff benefit from training programs on digitization techniques and Wikimedia project contribution?

- Yes
- No
- Unsure

What specific training topics would be most beneficial for your library staff?

**Identifying Challenges:**

What are the primary challenges faced by your library in digitizing and uploading works to Wikimedia Commons?

- Limited funding
- Infrastructure constraints
- Resistance to change
- Lack of technical expertise
- Other (please specify)

Can you provide examples of specific instances where these challenges have hindered digitization efforts?

**Overcoming Resistance:**

How do you think resistance to digitization initiatives can be overcome within your library?  
What strategies or interventions do you believe would be effective in addressing funding or infrastructure constraints?

**Capacity-Building Initiatives:**

Would your library be interested in participating in capacity-building initiatives aimed at overcoming challenges related to digitization and Wikimedia project contribution?

- Yes
- No
- Maybe

What specific types of support or resources do you think would be most beneficial for your library?

**Resource Mobilization:**

How receptive do you think local stakeholders, such as government agencies or community organizations, would be to supporting digitization efforts in libraries?

- Very receptive
- Somewhat receptive
- Not very receptive
- Not at all receptive

What strategies would you recommend for mobilizing resources and garnering support from these stakeholders?

**Best Practice Adoption:**

Are you aware of any successful digitization projects in other contexts that could serve as models for your library?

- Yes
- No
- Partially

If yes, what key lessons or best practices do you believe could be adapted and implemented in your library?

### **Knowledge Sharing:**

Would your library be interested in participating in knowledge-sharing networks or collaborations with other libraries engaged in similar digitization efforts?

- Yes
- No
- Maybe

How do you envision these knowledge-sharing initiatives benefiting your library and its digitization goals?

## **Interview Schedule for the Research Study on Digitization Initiatives in Nigerian Public Libraries**

### **Introduction:**

- Greet the interviewee and provide a brief overview of the study's purpose and objectives.
- Ensure informed consent and confidentiality.

### **Role and Responsibilities:**

- Ask about the interviewee's role in the library and their specific responsibilities related to digitization.

### **Library Profile:**

- Gather information about the library, including its size, location, and user demographics.

### **Current Practices:**

- Inquire about how the library currently provides digitized resources to users.
- Explore the types of materials that have been digitized and made accessible.

### **Policies and Procedures:**

- Discuss existing policies and procedures governing the implementation of digitization.
- Explore how these policies impact daily operations.

### **Challenges and Opportunities:**

- Identify challenges faced by the library in implementing these initiatives.
- Explore potential opportunities for improvement and innovation.

### **Staff Perceptions:**

- Probe into the interviewee's perceptions of digitization initiatives and their impact on library services.
- Explore any challenges or successes experienced.

#### **Funding Sources:**

- Inquire about the sources of funding for digitization projects.
- Explore the adequacy of financial resources.

#### **Technological Infrastructure:**

- Discuss the technological tools and infrastructure used for digitization.
- Explore any technological challenges faced.

#### **Suggestions for Improvement:**

- Invite suggestions for improving the effectiveness of digitization initiatives.
- Discuss potential areas for future development.

### **Focus Group Discussion (FGD) guide for the Research Study on Digitization Initiatives in Nigerian Public Libraries**

#### **Overview of the Study:**

Provide a brief overview of the research study and its objectives.

Emphasize the importance of participants' perspectives in shaping the study findings.

#### **Library Background:**

Ask participants to share their experiences and roles within the library.

Discuss the library's profile, including its size, location, and user demographics.

#### **Current Digitization Practices:**

Explore participants' perceptions of the library's current digitization practices.

Discuss any specific digitized resources that participants find noteworthy.

#### **Policies and Procedures:**

Inquire about participants' awareness and understanding of policies governing digitization.

Discuss how these policies impact their work and library services.

**Challenges Faced:**

Identify challenges participants encounter in implementing digitization initiatives.

Discuss potential solutions or improvements.

User Engagement and Feedback:

**Engagement Strategies:**

Explore strategies employed by the library to engage users with digitized resources.

Discuss the effectiveness of these strategies.

**Funding and Resources:**

Discuss participants' perspectives on funding sources for digitization projects.

Explore the adequacy of financial resources allocated.

**Technological Infrastructure:**

Inquire about the technological tools and infrastructure used for digitization.

Discuss participants' experiences with technology in the context of their work.

**Suggestions for Improvement:**

- Invite participants to share their suggestions for improving the effectiveness of digitization initiatives.
- Discuss potential areas for future development.
